# Supplementary material
Source: MDPI journal article supplement (https://www.mdpi.com/2072-4292/14/12/2759)
Supplement: s1 [file s1]

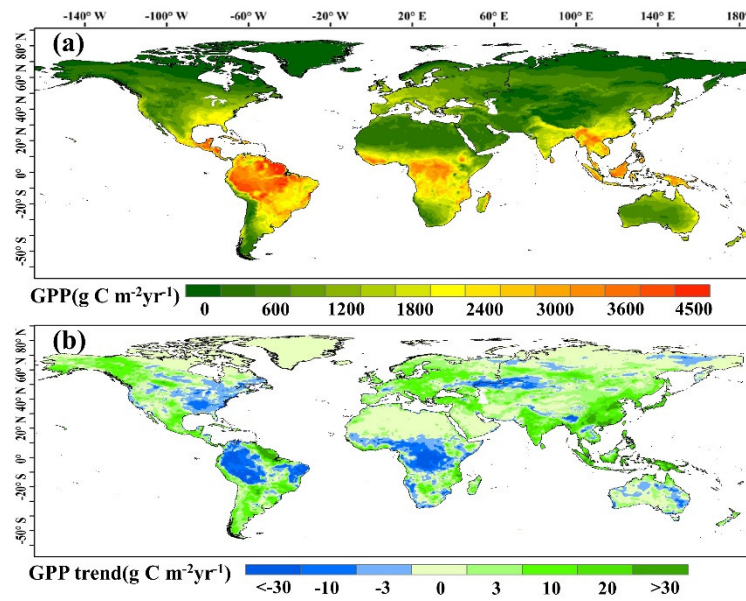

**Figure S1.** Spatial pattern of global GPP simulated by the AOD-LUE model during 2000–2019: (a) averaged annual GPP; (b) trend of annual GPP ( $\text{g C m}^{-2}\text{yr}^{-1}$ ).

**Table S1.** Information of the eddy covariance (EC) sites used in this study for model calibration and validation.

| <i>Model calibration</i> |          |           |                 |                     |
|--------------------------|----------|-----------|-----------------|---------------------|
| Site name                | Latitude | Longitude | Vegetation Type | Available years     |
| AU-Dry                   | -15.2588 | 132.3706  | WSA             | 2008-2014           |
| AU-How                   | -12.4943 | 131.1523  | SAV             | 2001-2014           |
| BE-Lon                   | 50.5516  | 4.7461    | CRO             | 2004-2014           |
| BE-Vie                   | 50.3050  | 5.9981    | MF              | 2000-2014           |
| BR-Sa1                   | -2.8567  | -54.9589  | EBF             | 2002-2011           |
| CA-Gro                   | 48.2167  | -82.1556  | MF              | 2003-2014           |
| CA-NS3                   | 55.9117  | -98.3822  | ENF             | 2001-2005           |
| CA-TP1                   | 42.6609  | -80.5595  | ENF             | 2003-2014           |
| CA-TP2                   | 42.7744  | -80.4588  | ENF             | 2003-2007           |
| CZ-BK1                   | 49.5021  | 18.5369   | ENF             | 2004-2014           |
| CZ-BK2                   | 49.4944  | 18.5429   | GRA             | 2006-2012           |
| DE-Gri                   | 50.9500  | 13.5126   | GRA             | 2005-2014           |
| DE-Kli                   | 50.8931  | 13.5224   | CRO             | 2004-2014           |
| DK-ZaH                   | 74.4733  | -20.5503  | GRA             | 2002-2014           |
| FR-Gri                   | 48.8442  | 1.9519    | CRO             | 2004-2014           |
| IT-Ro2                   | 42.3903  | 11.9209   | DBF             | 2004-2010           |
| IT-Tor                   | 45.8444  | 7.5781    | GRA             | 2008-2014           |
| MY-PSO                   | 2.9730   | 102.3062  | EBF             | 2003-2009           |
| RU-Fyo                   | 56.4615  | 32.9221   | ENF             | 2000-2014           |
| GF-Guy                   | 5.2788   | -52.9249  | EBF             | 2004-2014           |
| IT-Col                   | 41.8494  | 13.5881   | DBF             | 2001-2014           |
| US-Blo                   | 38.8953  | -120.6328 | ENF             | 2000-2007           |
| US-GLE                   | 41.3665  | -106.2399 | ENF             | 2005-2014           |
| US-Goo                   | 34.2547  | -89.8735  | GRA             | 2002-2006           |
| US-IB2                   | 41.8406  | -88.2410  | GRA             | 2004-2011           |
| US-Los                   | 46.0827  | -89.9792  | WET             | 2000-2014           |
| US-Myb                   | 38.0498  | -121.7651 | WET             | 2011-2014           |
| US-NR1                   | 40.0329  | -105.5464 | ENF             | 2000-2014           |
| US-Oho                   | 41.5545  | -83.8438  | DBF             | 2004-2013           |
| US-SRG                   | 31.7894  | -110.8277 | GRA             | 2008-2014           |
| US-SRM                   | 31.8214  | -110.8661 | SAV             | 2004-2014           |
| US-Syv                   | 46.2420  | -89.3477  | MF              | 2001-2014           |
| US-UMd                   | 45.5625  | -84.6975  | DBF             | 2007-2014           |
| US-Var                   | 38.4133  | -120.9507 | GRA             | 2000-2014           |
| US-WCr                   | 45.8059  | -90.0799  | DBF             | 2000-2006 2010-2014 |
| <i>Model validation</i>  |          |           |                 |                     |
| Site name                | Latitude | Longitude | Vegetation Type | Available years     |
| AT-Neu                   | 47.1167  | 11.3175   | GRA             | 2002-2012           |
| AU-ASM                   | -22.2830 | 133.2490  | ENF             | 2010-2014           |

|        |          |           |     |           |
|--------|----------|-----------|-----|-----------|
| AU-DaP | -14.0633 | 131.3181  | GRA | 2007-2013 |
| BE-Bra | 51.3076  | 4.5198    | MF  | 2000-2007 |
| CA-Oas | 53.6289  | -106.1978 | DBF | 2000-2010 |
| CA-Obs | 53.9872  | -105.1178 | ENF | 2000-2010 |
| CA-Qfo | 49.6925  | -74.3421  | ENF | 2003-2010 |
| CA-SF2 | 54.2539  | -105.8775 | ENF | 2001-2005 |
| CA-TP3 | 42.7068  | -80.3483  | ENF | 2003-2014 |
| CA-TP4 | 42.7102  | -80.3574  | ENF | 2002-2014 |
| CH-Cha | 47.2102  | 8.4104    | GRA | 2005-2014 |
| CH-Dav | 46.8153  | 9.8559    | ENF | 2005-2014 |
| CH-Fru | 47.1158  | 8.5378    | GRA | 2005-2014 |
| CN-Cha | 47.2102  | 8.4104    | GRA | 2003-2005 |
| CN-Dan | 30.4978  | 91.0664   | GRA | 2004-2005 |
| CZ-wet | 49.0247  | 14.7704   | WET | 2006-2014 |
| DE-Akm | 53.8662  | 13.6834   | WET | 2009-2014 |
| DK-NuF | 64.1308  | -51.3861  | WET | 2008-2014 |
| FR-LBr | 44.7171  | -0.7693   | ENF | 2000-2008 |
| FR-Pue | 43.7413  | 3.5957    | EBF | 2000-2014 |
| IT-Cpz | 41.7053  | 12.3761   | EBF | 2000-2008 |
| IT-Ro1 | 42.4081  | 11.9300   | DBF | 2000-2008 |
| US-ARM | 36.6058  | -97.4888  | CRO | 2003-2012 |
| US-Ha1 | 42.5378  | -72.1715  | DBF | 2000-2012 |
| US-KS2 | 28.6086  | -80.6715  | CSH | 2003-2006 |
| US-Me3 | 44.3154  | -121.6078 | ENF | 2004-2009 |
| US-MMS | 39.3232  | -86.4131  | DBF | 2000-2014 |
| US-Ne1 | 41.1651  | -96.4766  | CRO | 2001-2013 |
| US-Ne2 | 41.1649  | -96.4701  | CRO | 2001-2013 |
| US-Ne3 | 41.1797  | -96.4397  | CRO | 2001-2013 |
| US-SRC | 31.9083  | -110.8395 | OSH | 2008-2014 |
| US-Ton | 38.4316  | -120.9660 | SAV | 2001-2014 |
| US-Twt | 38.1087  | -121.6530 | CRO | 2009-2014 |
| US-UMB | 45.5598  | -84.7138  | DBF | 2000-2014 |
| US-Whs | 31.7438  | -110.0522 | OSH | 2007-2014 |

---
